# Supplementary material for: Polysaccharides fromEnteromorpha proliferaalleviate hypercholesterolemiaviamodulating the gut microbiota and bile acid metabolism
Source: Royal Society of Chemistry journal article supplement (doi:10.1039/d2fo02079c), 2022-01-01
Supplement: d2fo02079c1.pdf [file d2fo02079c1.pdf]

**Supplementary information**

Polysaccharides from *Enteromorpha prolifera* alleviate  
hypercholesterolemia via modulating gut microbiota and bile  
acid metabolism

Changwei Yang<sup>#a</sup>, Shiyong Huang<sup>#a</sup>, Zaigang Lin<sup>b</sup>, Hui Chen<sup>a</sup>, Caihong Xu<sup>a</sup>, Yiqi Lin<sup>a</sup>,

Huiyu Sun<sup>a</sup>, Fang Huang<sup>a</sup>, Dai Lin<sup>a</sup>, Fuchuan Guo<sup>\*a</sup>

<sup>a</sup> Department of Nutrition and Food Safety, School of Public Health, Fujian Medical  
University, Fuzhou 350122, P.R.China

<sup>b</sup> Laboratory Animal Center, Fujian Medical University, Fuzhou, 350122, P.R.China

<sup>#</sup> These authors contributed equally to this work.

<sup>\*</sup> Correspondence:

Address correspondence and reprint requests to Prof. Fuchuan Guo

E-mail: [guo2016fuchuan@163.com](mailto:guo2016fuchuan@163.com)

Phone: 86-591-22862576

Department of Nutrition and Food Safety, School of Public Health, Fujian Medical  
University, No. 1 Xuefu North Road, University Town, Fuzhou, Fujian Province, P.R.  
China, 350122

**Figure list**

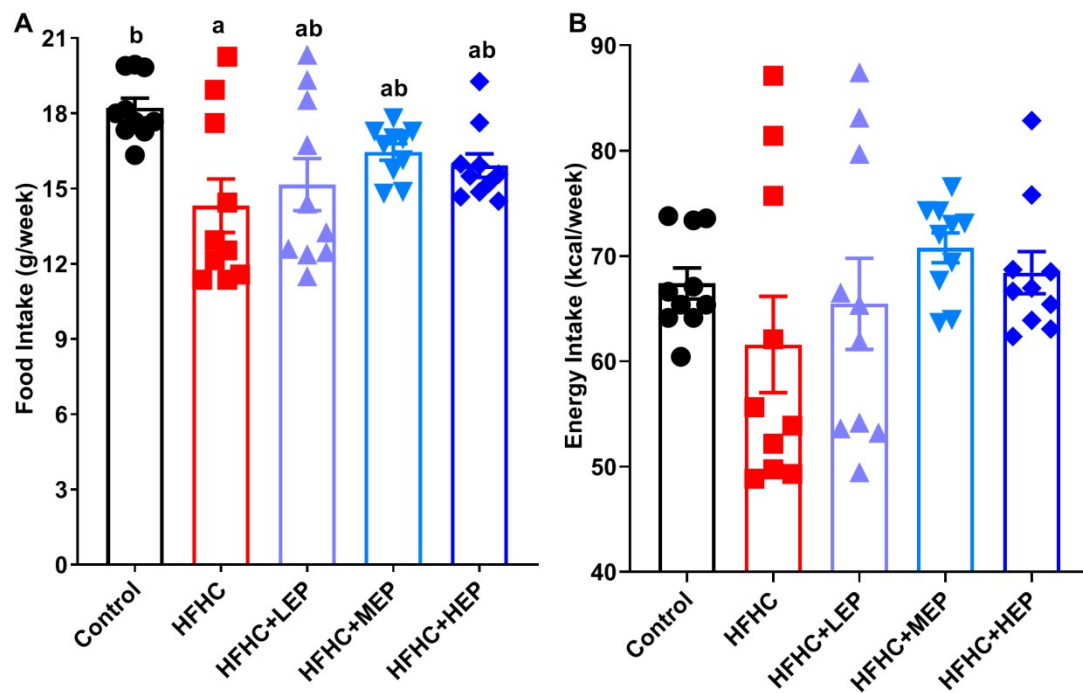

**Fig.S1 Effect of EP on energy intake in HFHC-diet fed mice.** (A) Food intake. (B) Energy intake. The average weekly energy intake of the Control group was calculated by the weekly food intake (g)  $\times$  3.7 (kcal/g, the energy density of the basal diet). Accordingly, the weekly energy intakes of HFHC, HFHC+LEP, HFHC+MEP, and HFHC+MEP groups were calculated by the weekly food intake (g)  $\times$  4.3 (kcal/g, the energy density of the HFHC diet). EP, Polysaccharides from *Enteromorpha prolifera*; HFHC, high-fat and high-cholesterol diet; HFHC+LEP, high-fat and high-cholesterol diet with low dose EP; HFHC+MEP, high-fat and high-cholesterol diet with middle dose EP; HFHC+HEP, high-fat and high-cholesterol diet with high dose EP. Data are shown in means  $\pm$  SEM (n = 10). a, b: Columns not sharing a common letter are significantly different ( $P < 0.05$ ).

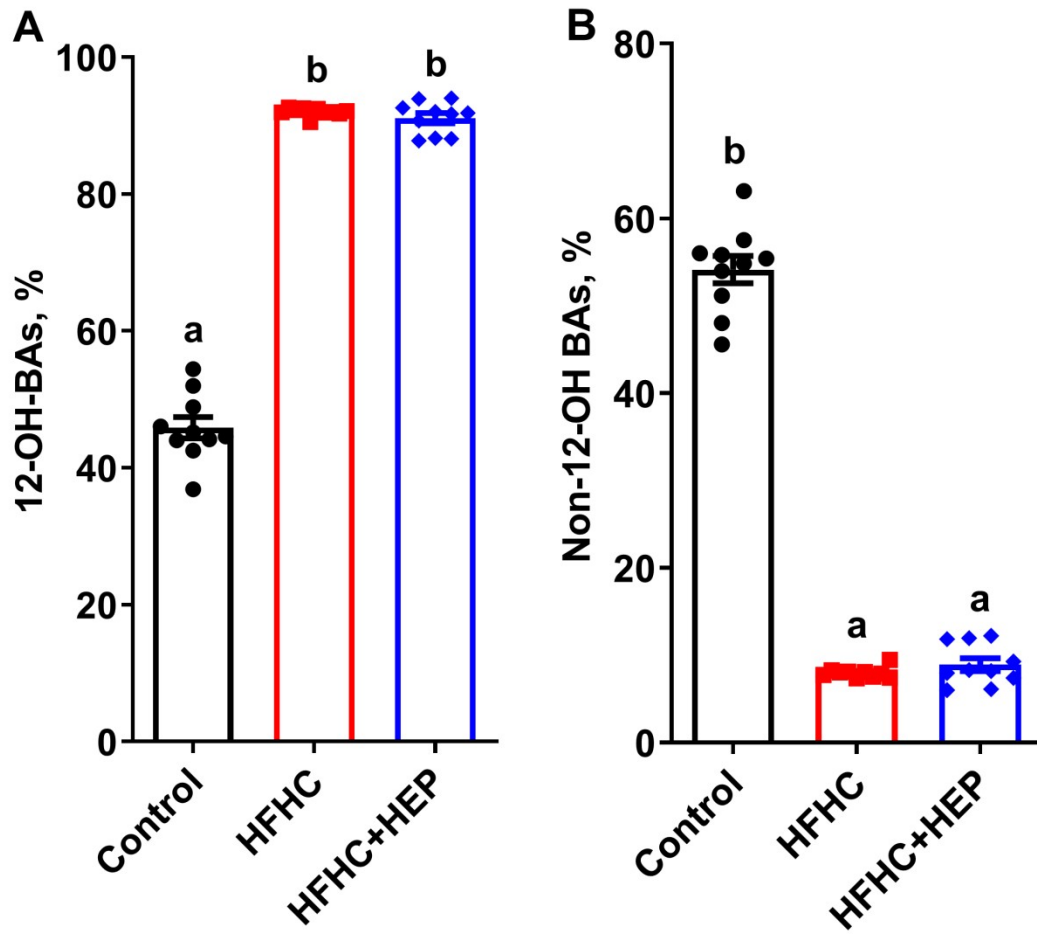

**Fig. S2 EP induced changes of fecal bile acids in mice.** (A) 12-hydroxylated bile acids (12-OH BAs) proportion. (B) Non-12-hydroxylated bile acids (Non-12-OH BAs) proportion. BAs, bile acids; EP, polysaccharides from *Enteromorpha prolifera*. Data are shown in means  $\pm$  SEM ( $n = 10$ ). a, b: Columns not sharing a common letter are significantly different ( $P < 0.05$ ).

**Table S1 Primers of genes analyzed by real-time PCR**

| Gene           | Primer Sequence (5' – 3')                               |
|----------------|---------------------------------------------------------|
| $\beta$ -ACTIN | F: CATCCGTAAAGACCTCTATGCCAAC<br>R: ATGGAGCCACCGATCCACA  |
| SREBP2         | F: CCCACTCAGAACACCAAGCAT<br>R: TGGCAGTAGCTCGCTCTCGT     |
| HMGCR          | F: TCGTTAGCACTGGTCCAGGAA<br>R: GGCTCCATCATTGGCTCTGTA    |
| GPBAR1         | F: TGCCCAAAGGTGTCTACGAGTG<br>R: GCTGCATTGGCTACTGGTGTG   |
| LDLR           | F: TGACCTTCATCCCAGAGCCTTC<br>R: GGCATGAGCGGGTATCCATC    |
| APOA1          | F: AATGTGTATGTGGATGCGGTCAA<br>R: AGCCGTTCCCTGCAGCTGACTA |
| APOB           | F: CAGGTGGCCACAGCCAATAA<br>R: ACTGCAGGTCTGGCTCAGGA      |
| CYP7A1         | F: ACCTCCGGGCCTTCCTAAA<br>R: TCAAACATCACTCGGTAGCAGAA    |
| CYP27A1        | F: GGACAACCTCCTTTGGGACTTAC<br>R: TGCCCTCCTGTCTCATCACTT  |
| NR1H4 (FXR)    | F: TCTGCTCACAGCGATCGTCA<br>R: AAATGCTGCGGGTTCTCAGG      |

**Table S2 List of primary antibodies**

| <b>Antibody</b> | <b>Host</b> | <b>Dilution</b> | <b>Company</b>                    | <b>Catalog no.</b> |
|-----------------|-------------|-----------------|-----------------------------------|--------------------|
| HMGCR           | Rabbit      | 1:2000          | ABclonal Technology, Wuhan, China | A19063             |
| LDLR            | Rabbit      | 1:2000          | ABclonal Technology, Wuhan, China | A20808             |
| SREBP-2         | Rabbit      | 1:2000          | Proteintech Group, Wuhan, China   | 28212-1-AP         |
| CYP27A1         | Rabbit      | 1:1000          | Proteintech Group, Wuhan, China   | 14739-1-AP         |
| Affinity        |             |                 |                                   |                    |
| CYP7A1          | Rabbit      | 1:2000          | Biosciences,Changzhou,China       | DF2612             |
| GAPDH           | Rabbit      | 1:10000         | ABclonal Technology, Wuhan, China | A19056             |
| HRP Goat        | Rabbit      | 1:10000         | ABclonal Technology, Wuhan, China | AS014              |

**Table S3 Bile acid content in the feces of Control, HFHC and HFHC+HEP mice (nmol/L)**

| Class        | Full name                   | Abbreviation   | Control   | HFHC          | HFHC+HEP      |
|--------------|-----------------------------|----------------|-----------|---------------|---------------|
| Unconjugated | Dehydrolithocholic acid     | DHLCA          | 4.16±0.30 | 2.54±0.32↓*** | 2.46±0.54     |
| Unconjugated | Allolithocholic acid        | alloLCA        | 4.26±0.41 | 2.97±0.31↓*** | 3.10±0.40     |
| Unconjugated | Isolithocholic acid         | isoDCA         | 4.05±0.29 | 2.96±0.41↓*** | 2.93±0.64     |
| Unconjugated | Lithocholic acid            | LCA            | 5.12±0.26 | 4.69±0.29↓*   | 4.56±0.58     |
| Unconjugated | 23-Nordeoxycholic acid      | 23-NorDCA      | 2.41±0.61 | 2.44±0.21     | 2.27±0.49     |
| Unconjugated | 7-Ketolithocholic acid      | 7-ketoDCA      | 3.59±0.12 | 3.72±0.21     | 3.85±0.14     |
| Unconjugated | 12-Ketolithocholic acid     | 12-ketoLCA     | 5.41±0.25 | 5.53±0.28     | 5.35±0.64     |
| Unconjugated | Apocholic acid              | apoCA          | 3.99±0.16 | 4.24±0.21↑*   | 4.34±0.23     |
| Unconjugated | Ursodeoxycholic acid        | UDCA           | 4.78±0.34 | 4.25±0.26↓*** | 4.49±0.11↑#   |
| Unconjugated | Hyodeoxycholic acid         | HDCA           | 5.06±0.25 | 4.65±0.24↓**  | 4.63±0.35     |
| Unconjugated | Chenodeoxycholic acid       | CDCA           | 3.90±0.26 | 4.42±0.27↑*** | 4.55±0.11     |
| Unconjugated | Deoxycholic acid            | DCA            | 5.70±0.41 | 6.77±0.20↑*** | 6.48±0.66     |
| Unconjugated | Dehydrocholic acid          | DHCA           | 2.90±0.69 | 3.07±0.76     | 2.92±0.47     |
| Unconjugated | 7,12-Diketolithocholic acid | 7,12-diketoLCA | 3.27±0.36 | 4.20±0.41↑*** | 4.32±0.31     |
| Unconjugated | 6,7-Diketolithocholic acid  | 6,7-diketoLCA  | 3.23±0.96 | 2.42±0.72↓*   | 2.43±0.27     |
| Unconjugated | 7-Ketodeoxycholic acid      | 7-ketoDCA      | 5.28±0.19 | 6.08±0.38↑*** | 6.12±0.15     |
| Unconjugated | 12-Dehydrocholic acid       | 12-DHCA        | 3.96±0.14 | 5.30±0.35↑*** | 5.40±0.30     |
| Unconjugated | 3-Dehydrocholic acid        | 3-DHCA         | 3.58±0.27 | 5.19±0.33↑*** | 5.29±0.33     |
| Unconjugated | Ursocholic acid             | UCA            | 3.82±0.37 | 4.94±0.25↑*** | 5.83±0.74↓### |
| Unconjugated | α-Muricholic acid           | α-MCA          | 5.46±0.35 | 5.73±0.17↑*   | 5.82±0.13     |
| Unconjugated | β-Muricholic acid           | β-MCA          | 4.98±0.27 | 5.18±0.29     | 5.34±0.18     |
| Unconjugated | λ-Muricholic acid           | λ-MCA          | 4.05±0.42 | 4.04±0.18     | 4.41±0.24↑#   |
| Unconjugated | Allocholic acid             | ACA            | 4.48±0.82 | 5.40±0.14↑*** | 5.32±0.13     |
| Unconjugated | Cholic acid                 | CA             | 4.77±0.26 | 6.82±0.32↑*** | 6.86±0.19     |
| Conjugated   | Glycolithocholic acid       | GLCA           | 2.35±0.55 | 3.90±0.31↑*** | 3.25±0.74↓#   |
| Conjugated   | Glycocholic acid            | GCA            | 2.33±0.69 | 4.33±0.53↑*** | 3.94±0.51     |
| Conjugated   | Tauroolithocholic acid      | TLCA           | 2.31±0.62 | 3.02±0.60↑*   | 2.51±0.65     |
| Conjugated   | Tauroursodeoxycholic acid   | TUDCA          | 3.25±0.40 | 3.79±0.71     | 3.87±0.62     |
| Conjugated   | Taurohyodeoxycholic acid    | THDCA          | 3.20±0.31 | 3.75±0.65↑*   | 3.41±0.68     |
| Conjugated   | Taurochenodeoxycholic acid  | TCDCA          | 2.95±0.42 | 3.67±0.77↑*   | 3.51±0.68     |
| Conjugated   | Taurodeoxycholic acid       | TDCA           | 3.58±0.34 | 5.61±0.58↑*** | 5.05±0.90     |
| Conjugated   | Tauro α-Muricholic acid     | T-α-MCA        | 3.88±0.35 | 4.84±0.72↑**  | 4.71±0.58     |
| Conjugated   | Tauro β-Muricholic acid     | T-β-MCA        | 4.18±0.36 | 4.91±0.82↑*   | 4.88±0.67     |
| Conjugated   | Taurocholic acid            | TCA            | 4.42±0.27 | 6.19±0.75↑*** | 6.00±0.69     |

\* Means the difference between Control group and HFHC group; # Means the difference between

HFHC and HFHC+HEP group. Data are shown in means ± SEM (n = 10). \*  $P < 0.05$ , \*\*  $P < 0.01$ ,

\*\*\*  $P < 0.001$ , #  $P < 0.05$ , ##  $P < 0.01$ , ###  $P < 0.001$ .

**Method S1. Bile acids quantification**

Briefly, fecal samples (25mg) were weighed and reconstituted with 1000  $\mu\text{L}$  of a mixture of MeOH: MeCN:  $\text{H}_2\text{O}$  at a volume ratio of 2:2:1 (v/v/v). For homogenization, samples were vortexed for 30s, grounded at 35Hz for 4 minutes, and ultra-sonicated for 5 minutes in an ice-water bath. Samples were centrifuged after 1 hour of incubation at  $-40^\circ\text{C}$ . The supernatant was collected and injected for UHPLC-MS/MS analysis. A Q Exactive Focus mass spectrometer coupled with UPLC (Agilent Technologies, Palo Alto, CA, USA) was used and operated in Parallel Reaction Monitoring (PRM) mode.

Peak signal intensity, chromatographic peak shape, and retention time stability were monitored. Linearity (linear correlation coefficient) ranged between 0.9926 – 1 (Table S2). Limits of detection were calculated based on calibration curves for spiked samples at a concentration of maximum signal to noise of 3. The limit of quantification was determined as the lowest standard in the linear calibration curve and the recovery rate was 105.6% - 233.8%.
